# Supplementary material for: How enhancers regulate wavelike gene expression patterns
Source: eLife journal article supplement (doi:10.7554/elife.84969), 2023-07-11
Supplement: supp [file elife-84969-supp-v1.zip]

**A**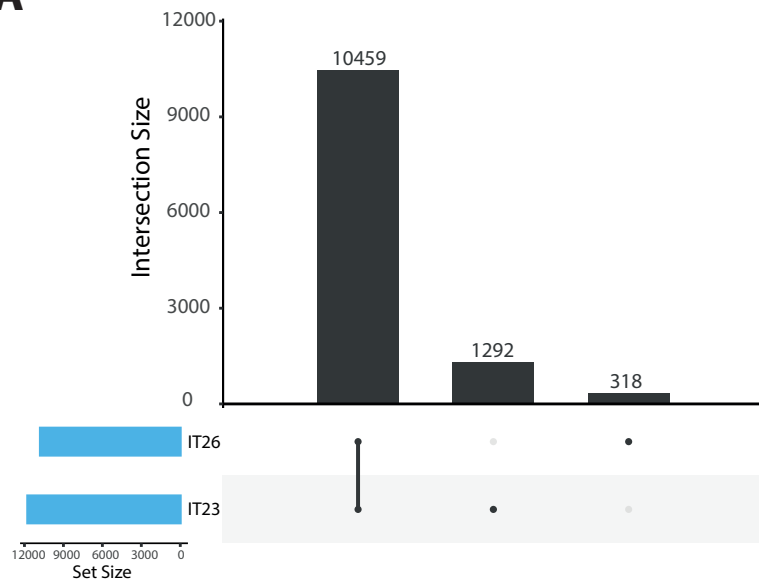**B**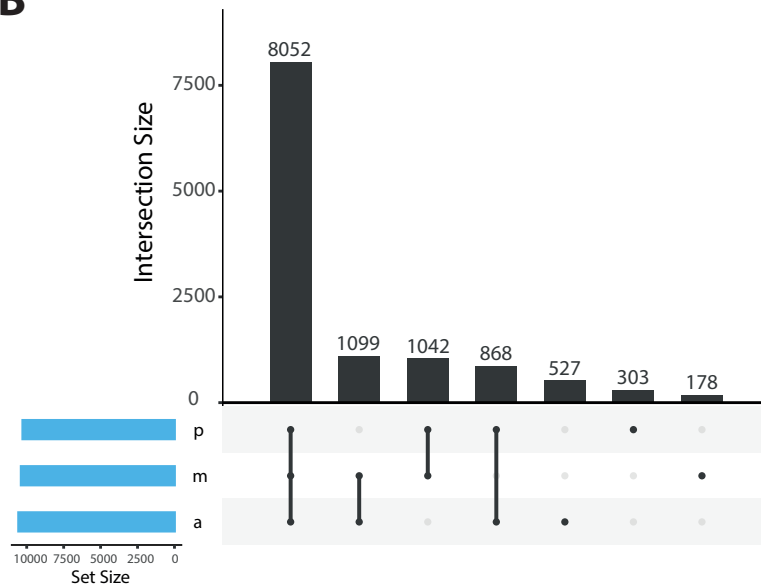

**Figure 2-figure supplement 2: Upset plot comparing the number of sites identified in samples corresponding to IT23 and IT26 as well as along the AP axis.**
