# Supplementary material for: How enhancers regulate wavelike gene expression patterns
Source: eLife journal article supplement (doi:10.7554/elife.84969), 2023-07-11
Supplement: supp [file elife-84969-supp-v1.zip]

hbA>MS2-yellow x aTub>MCP-mEmerald  
(germband; fixed embryo)

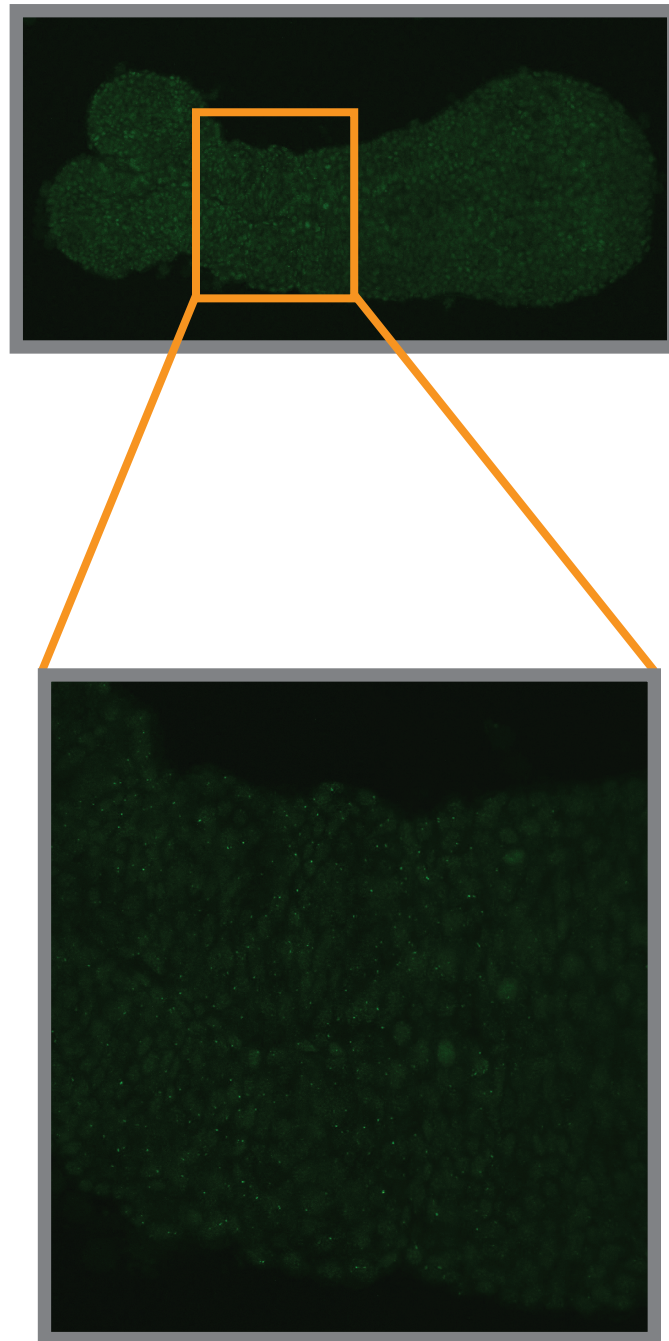

**Figure 3-figure supplement 1: Analysis of hbA enhancer activity on a fixed embryo.**
