# Supplementary material for: How enhancers regulate wavelike gene expression patterns
Source: eLife journal article supplement (doi:10.7554/elife.84969), 2023-07-11
Supplement: supp [file elife-84969-supp-v1.zip]

Hoechst

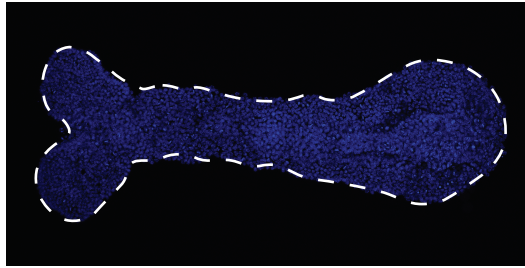

*run*

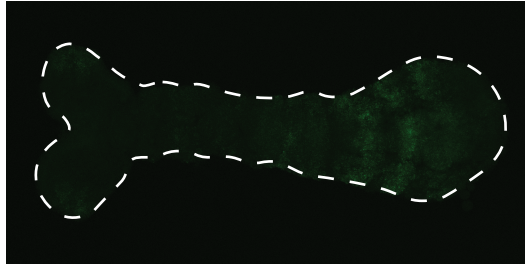

runB>*yellow* exonic

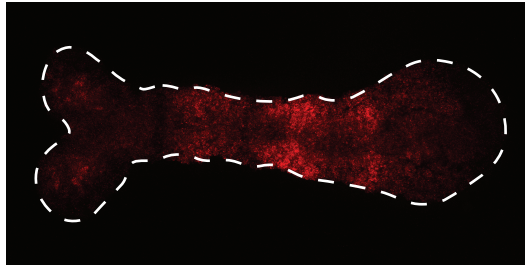

runB>*yellow* intronic

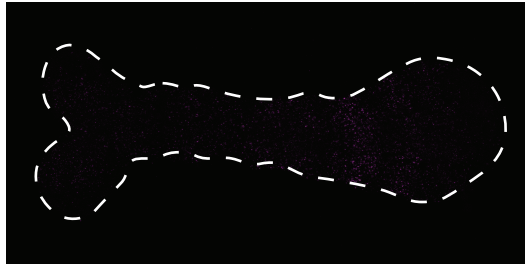

**Figure 6-figure supplement 1: Visualizing runB>yellow expression waves in the germband using exonic vs intronic probes.**
