# Supplementary material for: How enhancers regulate wavelike gene expression patterns
Source: eLife journal article supplement (doi:10.7554/elife.84969), 2023-07-11
Supplement: supp [file elife-84969-supp-v1.zip]

Spearman Correlation of Read Counts

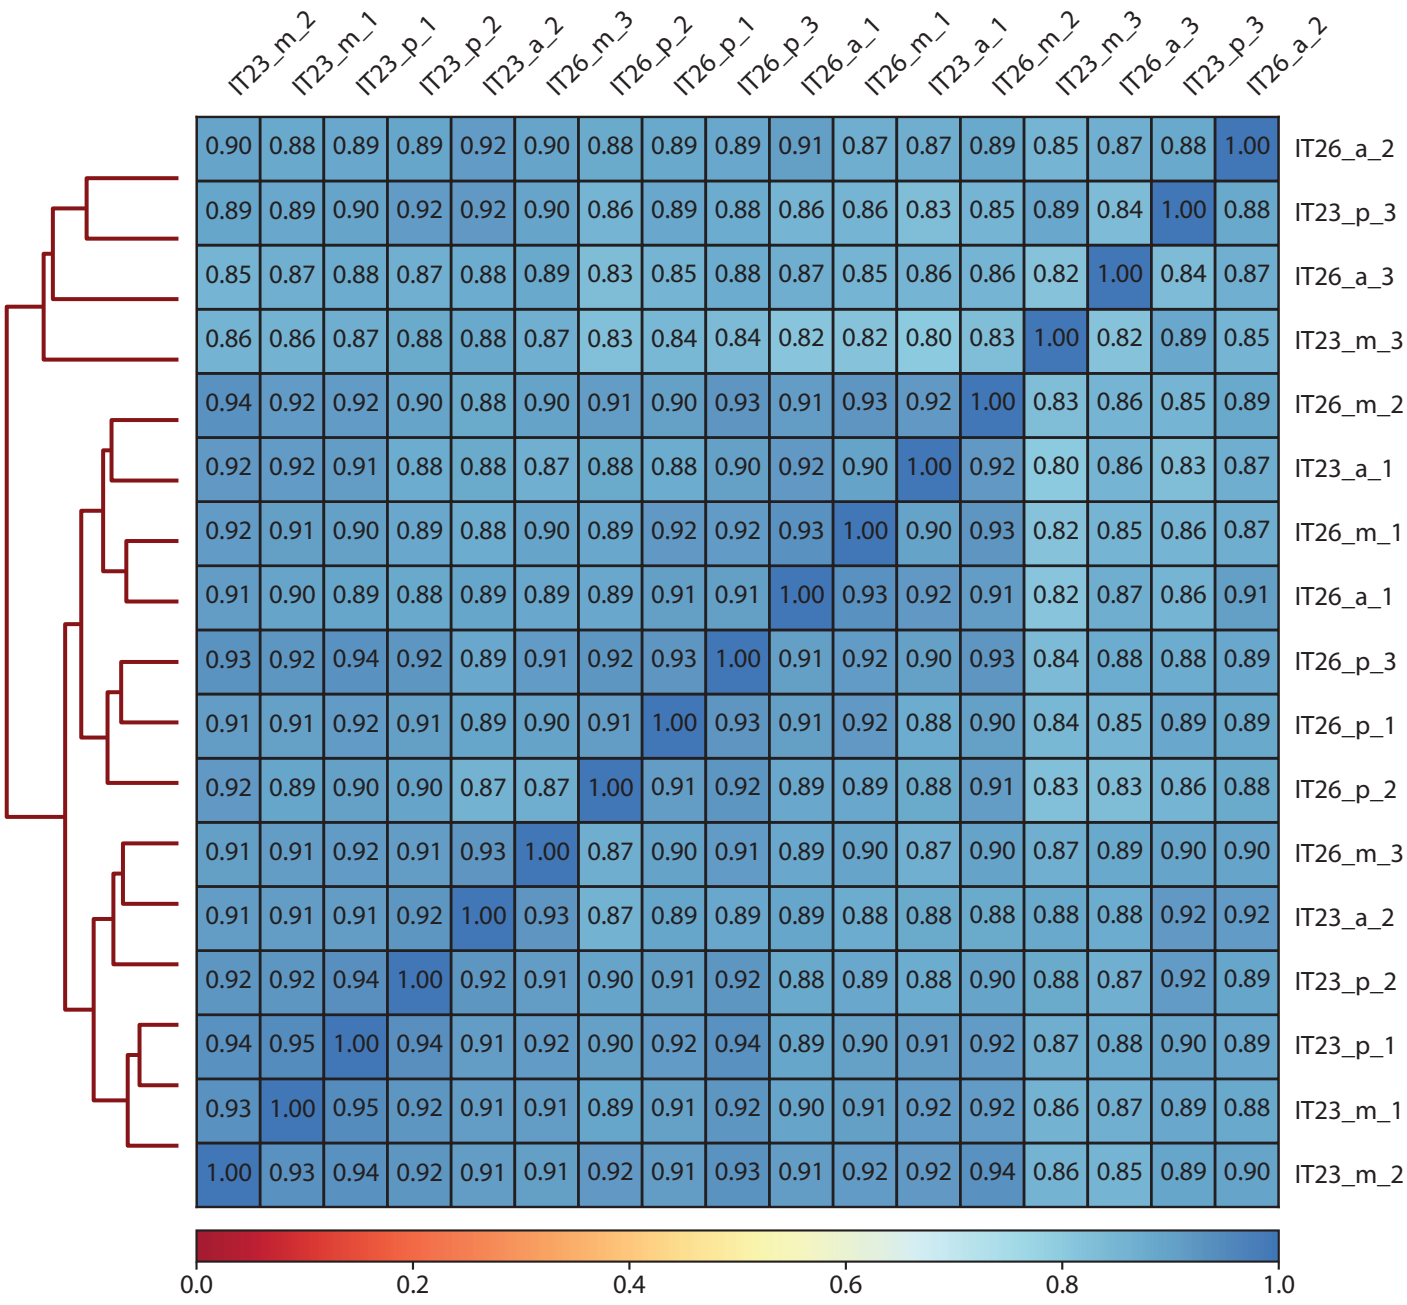

Figure 2-figure supplement 1: Correlation between ATAC-seq sequencing libraries.
