# Supplementary figures and images for: How enhancers regulate wavelike gene expression patterns
Source: eLife journal article supplement (doi:10.7554/elife.84969), 2023-07-11

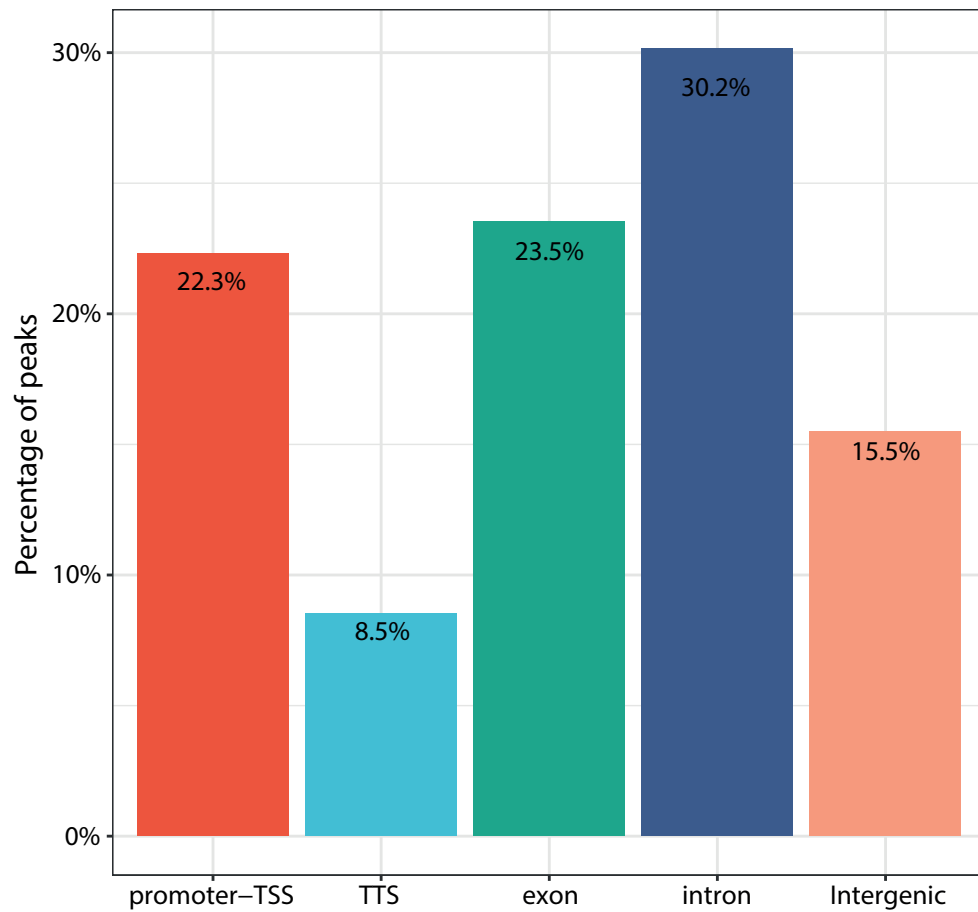

**Figure 2-figure supplement 3: Annotation of consensus sites.**

Supplement: supp [file elife-84969-supp-v1.zip]

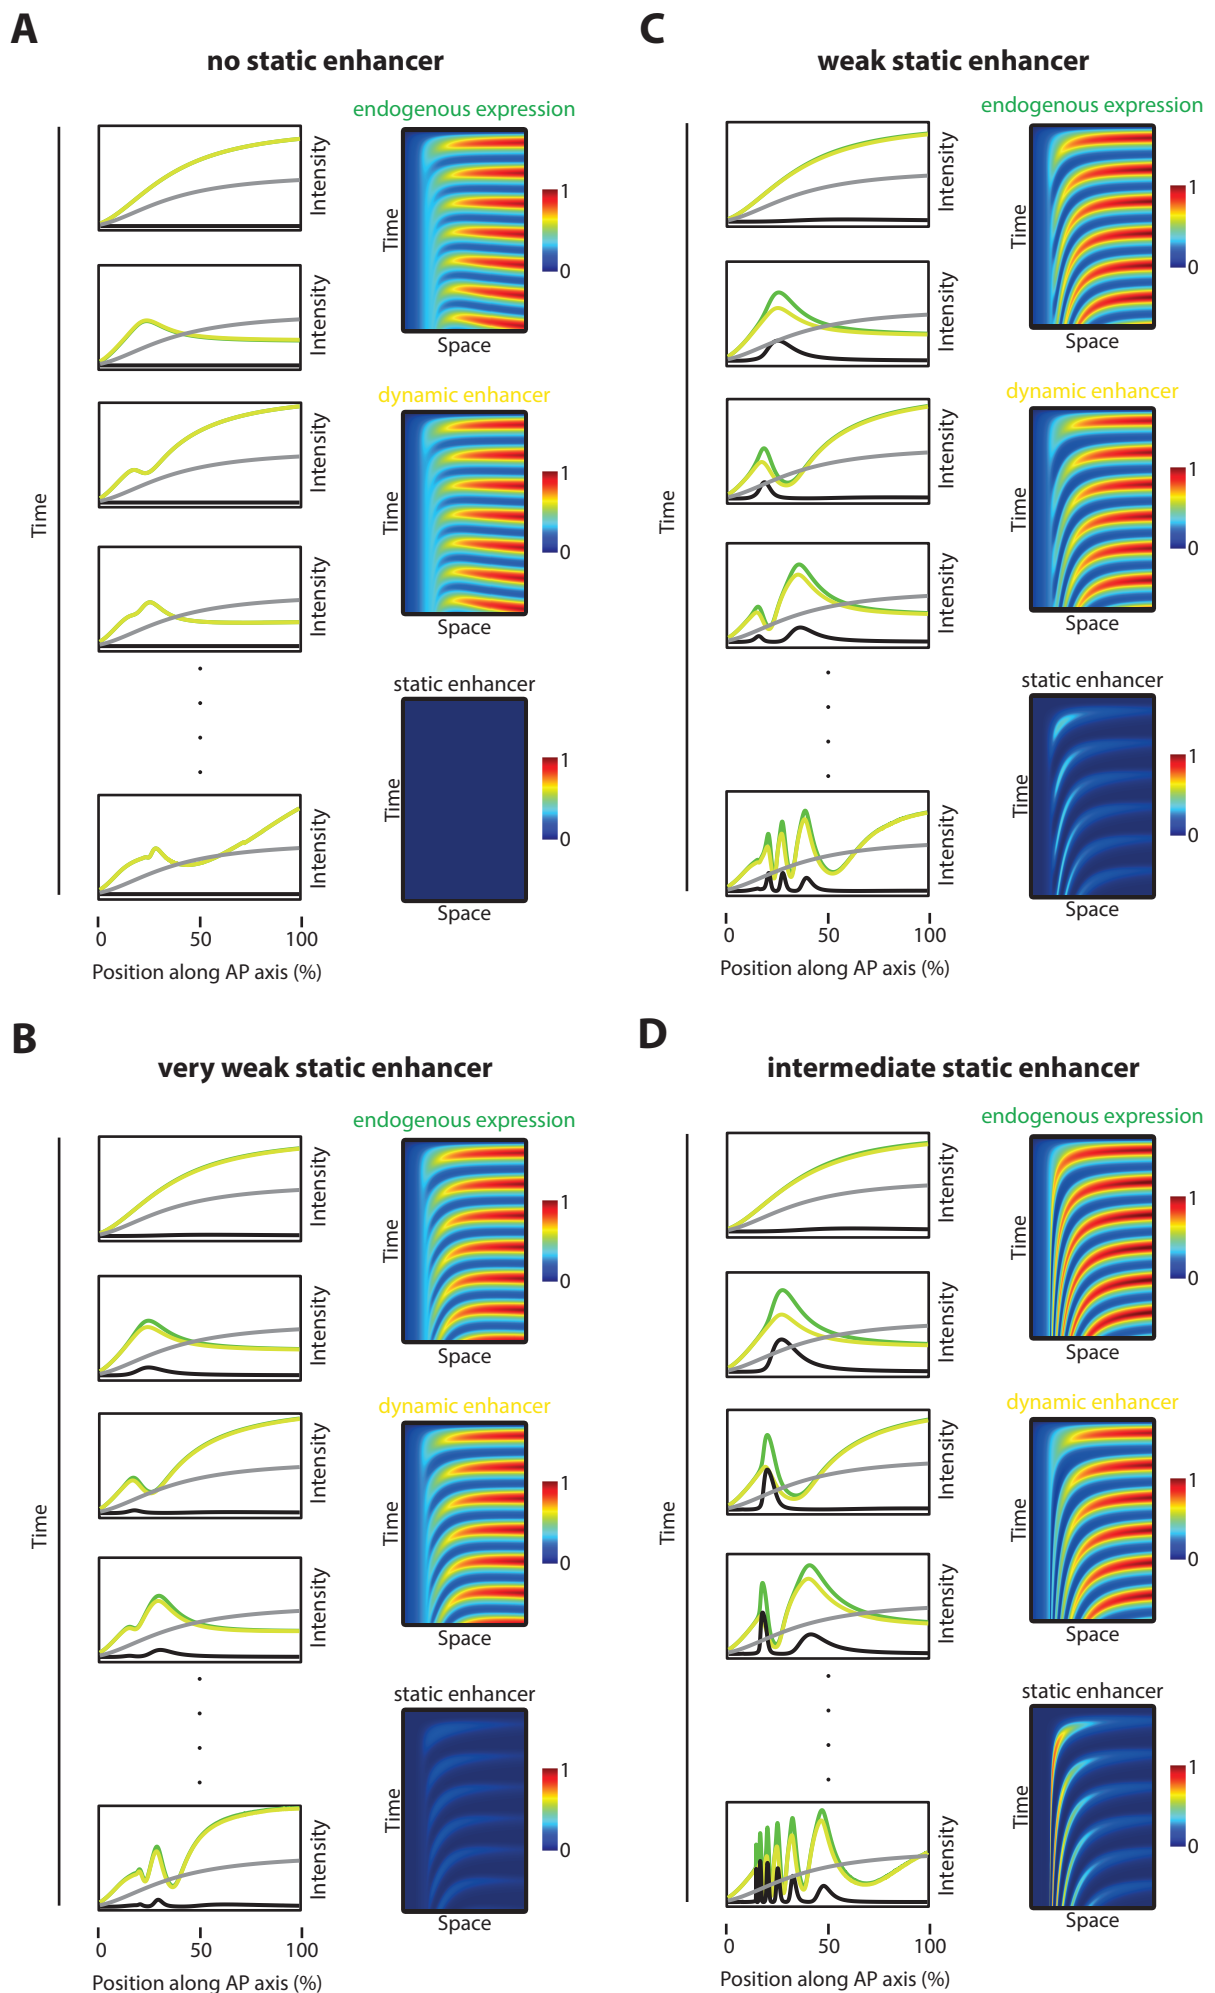

**Figure 5- figure supplement 1: Simulations with different static enhancer strength.**

Supplement: supp [file elife-84969-supp-v1.zip]

**A**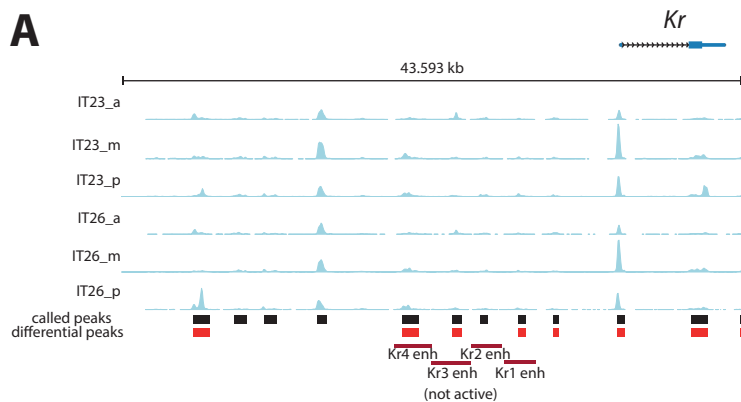**B**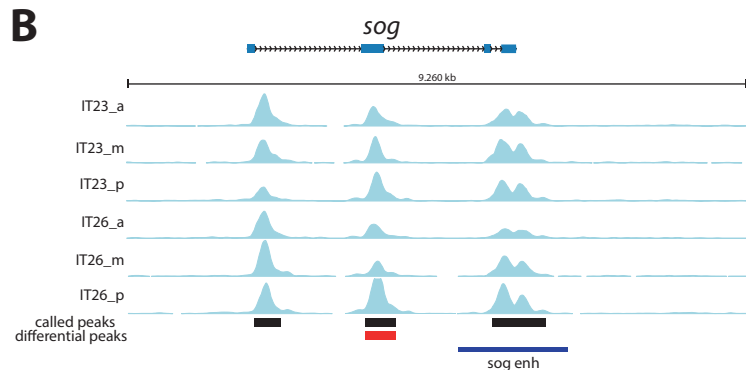**C**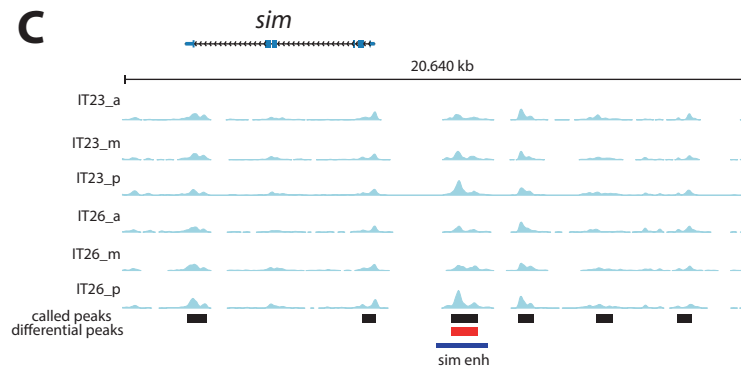

**Figure 4-figure supplement 1: Genomic tracks of analyzed enhancer reporter constructs.**

Supplement: supp [file elife-84969-supp-v1.zip]

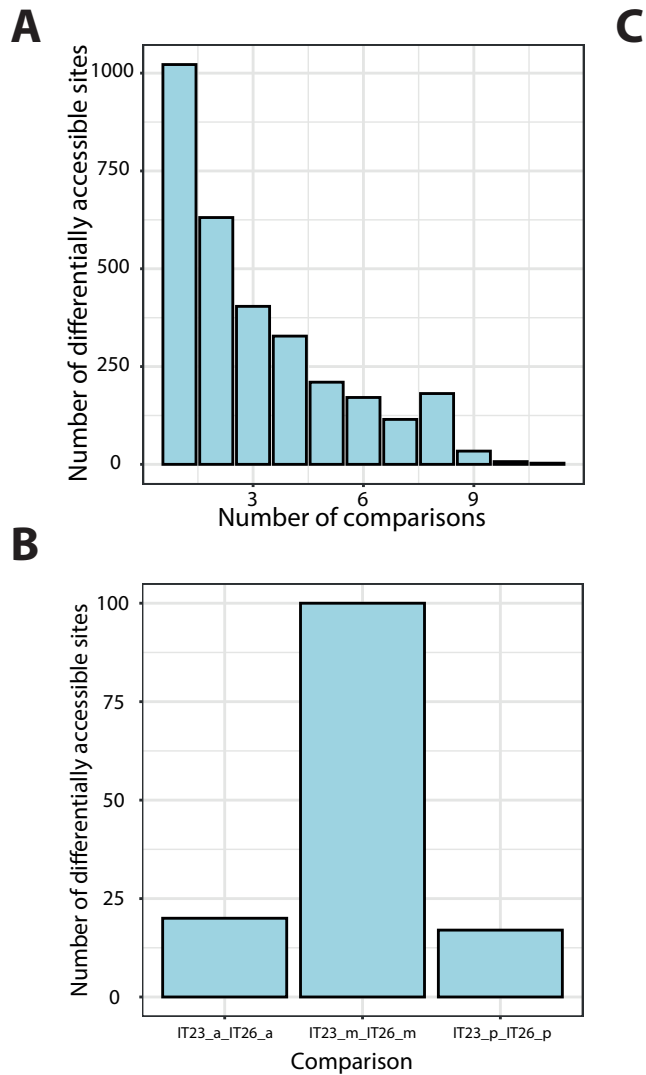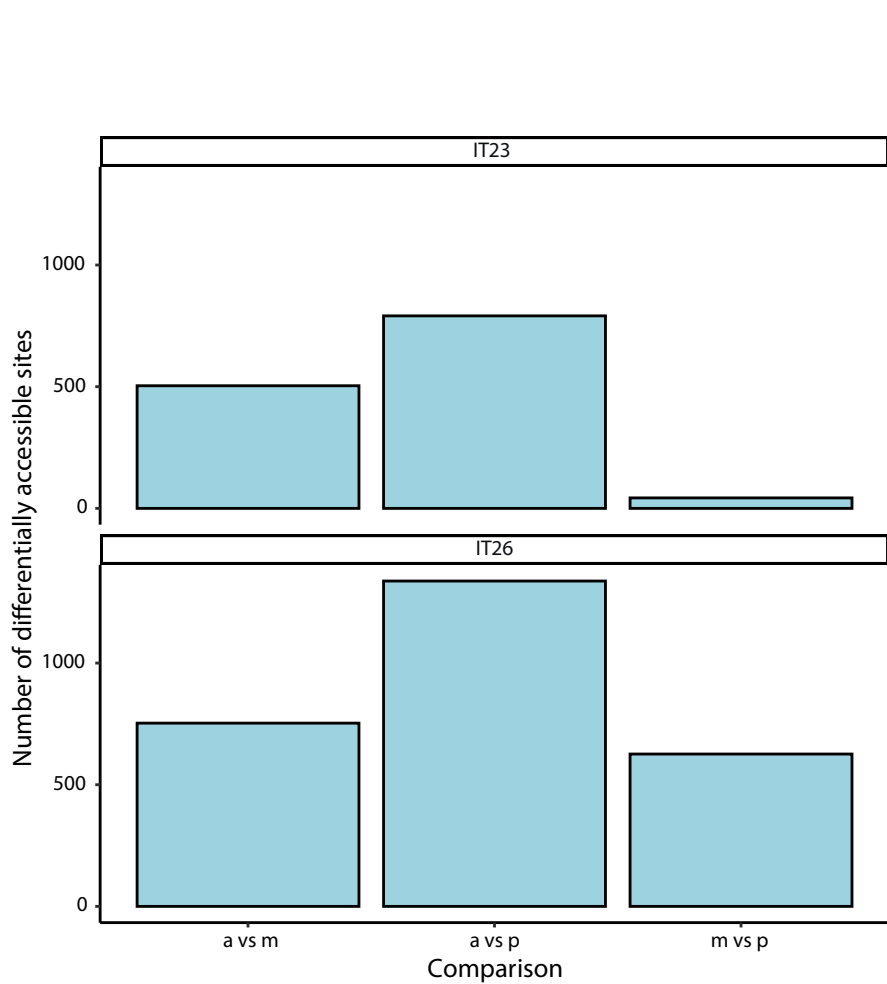

**Figure 2-figure supplement 4: Analysis of differentially accessible sites.**

Supplement: supp [file elife-84969-supp-v1.zip]
